# Supplementary material for: Plasmonic behavior of ionic liquid stabilized gold nanoparticles in molecular solvents
Source: Royal Society of Chemistry journal article supplement (doi:10.1039/c7nj01324h), 2017-01-01
Supplement: c7nj01324h1.pdf [file c7nj01324h1.pdf]

## Supporting Information

### Plasmonic Behavior of Ionic Liquid Stabilized Gold Nanoparticles in Molecular Solvents

Sachin Thawarkar,<sup>b</sup> Balu Thombare,<sup>a</sup> Nageshwar D Khupse,<sup>a\*</sup>

<sup>a.</sup> Department of Physics, Savitribai Phule Pune University, Ganeshkhind, Pune, 411008 India,

<sup>b.</sup> Physical and Materials Chemistry Division, CSIR-National Chemical Laboratory, Dr. Homi bhabha Road, Pune, 411008, India

Email: [nageshkhupse@gmail.com](mailto:nageshkhupse@gmail.com)

#### Supporting Data

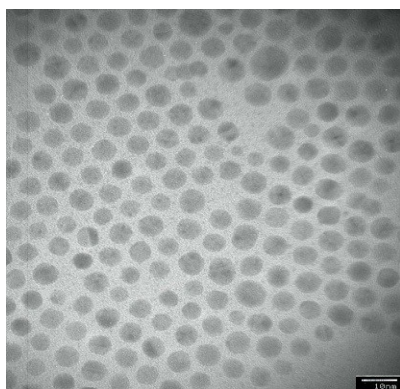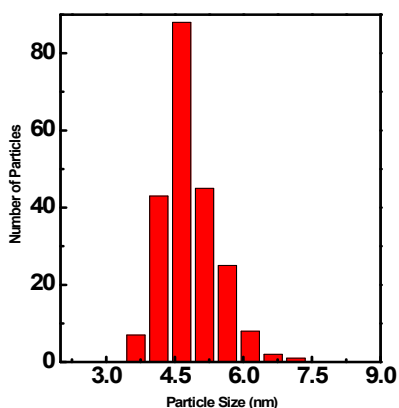

Fig. S11: TEM image and particle size distribution histogram for the AuNPs capped with [C<sub>4</sub>,C<sub>14</sub>-im]Br (Au@[C<sub>4</sub>,C<sub>14</sub>-im]Br)

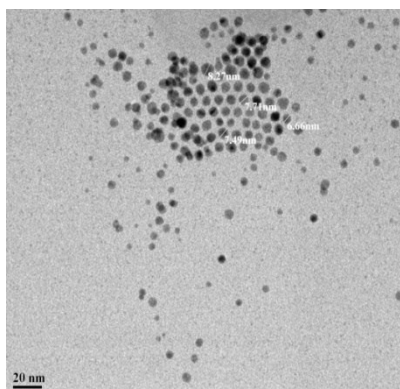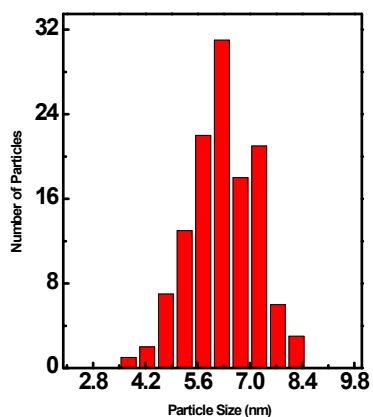

Fig. S12: TEM image and particle size distribution histogram for the AuNPs capped with [C<sub>4</sub>,C<sub>16</sub>-im]Br (Au@[C<sub>4</sub>,C<sub>16</sub>-im]Br) after redispersion in water

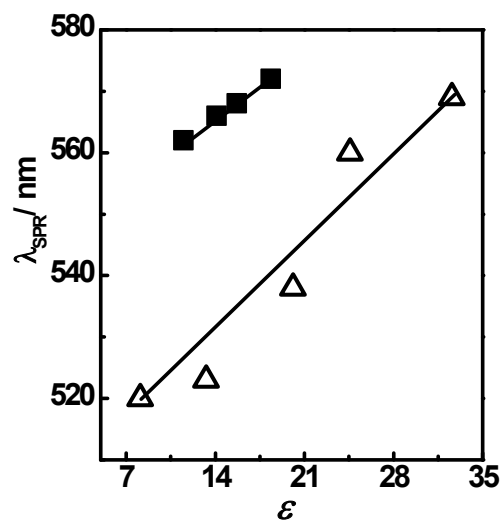

Fig SI3: Plot of  $\lambda_{\text{SPR}}$  of Au@[C<sub>4</sub>,C<sub>16</sub>-im]Br vs dielectric constant ( $\epsilon$ ) of PEGs ( $\blacksquare$ ) and alcohols ( $\triangle$ )

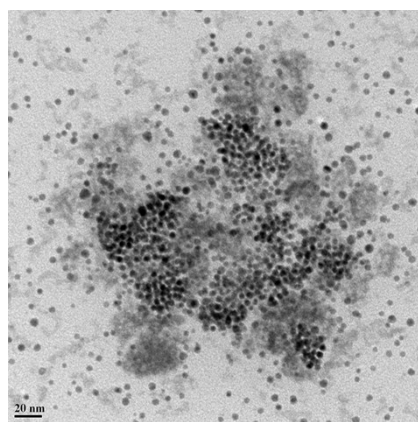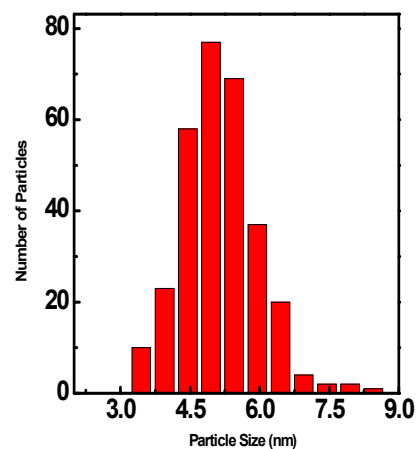

Fig. SI4: TEM image and particle size distribution histogram for the AuNPs capped with [C<sub>4</sub>,C<sub>16</sub>-im]Br (Au@[C<sub>4</sub>,C<sub>16</sub>-im]Br) after transferring to methanol

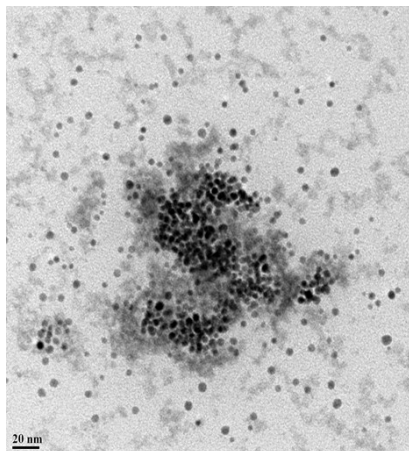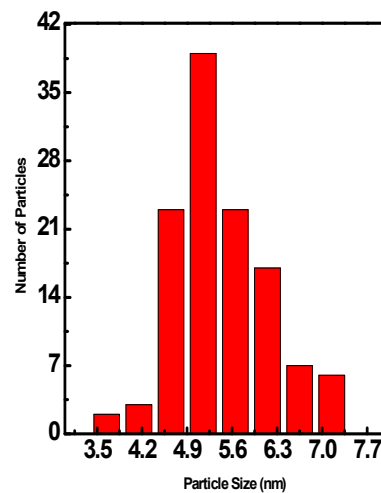

Fig. SI5: TEM image and particle size distribution histogram for the AuNPs capped with  $[C_4,C_{16}\text{-im}]\text{Br}$  ( $\text{Au}@[C_4,C_{16}\text{-im}]\text{Br}$ ) after transferring to ethanol

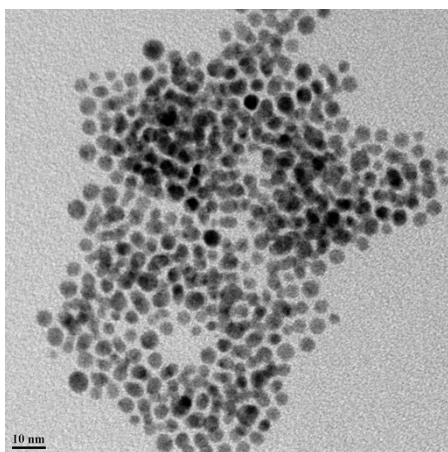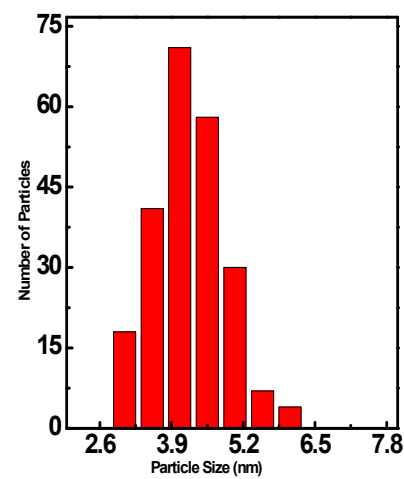

Fig. SI6: TEM image and particle size distribution histogram for the AuNPs capped with  $[C_4,C_{16}\text{-im}]\text{Br}$  ( $\text{Au}@[C_4,C_{16}\text{-im}]\text{Br}$ ) after transferring to Butanol
